# Supplementary material for: Media trust and infection mitigating behaviours during the COVID-19 pandemic in the USA
Source: PubMed Central journal article supplement — BMJ Glob Health. 2020 Oct 9;5(10):e003323. doi: 10.1136/bmjgh-2020-003323 (PMC7545496; doi:10.1136/bmjgh-2020-003323), 2020-10-09
Supplement: bmjgh-2020-003323supp001.pdf [file bmjgh-2020-003323supp001.pdf]

Supplemental Table 1. Preventive & Risky Behaviors Trends across Media Preference Group from Wave 1 to Wave 5

|                                         | Trust Fox News More |                 | Difference <sup>1</sup> |     | Trust Equally |                 | Difference <sup>2</sup> |     | Trust CNN More |                 |
|-----------------------------------------|---------------------|-----------------|-------------------------|-----|---------------|-----------------|-------------------------|-----|----------------|-----------------|
|                                         | %                   | CI              | p                       |     | %             | CI              | p                       |     | %              | CI              |
| <b>Preventive Behaviors<sup>3</sup></b> |                     |                 |                         |     |               |                 |                         |     |                |                 |
| <b>Avoid Public</b>                     |                     |                 |                         |     |               |                 |                         |     |                |                 |
| wave 1                                  | 49.4%               | [45.2% , 53.6%] | 0.622                   |     | 50.6%         | [47.9% , 53.3%] | 0.000                   | *** | 59.1%          | [55.7% , 62.5%] |
| wave 2                                  | 90.3%               | [87.3% , 92.7%] | 0.861                   |     | 90.0%         | [88.2% , 91.6%] | 0.008                   | **  | 93.5%          | [91.3% , 95.2%] |
| wave 3                                  | 85.6%               | [82.2% , 88.5%] | 0.180                   |     | 88.1%         | [86.2% , 89.8%] | 0.001                   | **  | 92.7%          | [90.5% , 94.4%] |
| wave 4                                  | 78.2%               | [74.4% , 81.6%] | 0.031                   | *   | 82.8%         | [80.6% , 84.8%] | 0.000                   | *** | 91.2%          | [88.9% , 93.1%] |
| wave 5                                  | 65.9%               | [61.7% , 70.0%] | 0.000                   | *** | 78.4%         | [76.0% , 80.5%] | 0.000                   | *** | 87.1%          | [84.4% , 89.4%] |
| <b>Wash Hands</b>                       |                     |                 |                         |     |               |                 |                         |     |                |                 |
| wave 1                                  | 87.1%               | [83.9% , 89.7%] | 0.920                   |     | 86.9%         | [84.9% , 88.7%] | 0.000                   | *** | 92.9%          | [91.1% , 94.4%] |
| wave 2                                  | 96.0%               | [94.0% , 97.3%] | 0.951                   |     | 95.9%         | [94.7% , 96.9%] | 0.472                   |     | 95.2%          | [93.4% , 96.6%] |
| wave 3                                  | 93.6%               | [90.9% , 95.5%] | 0.173                   |     | 95.4%         | [94.1% , 96.4%] | 0.650                   |     | 94.9%          | [93.0% , 96.3%] |
| wave 4                                  | 91.6%               | [88.8% , 93.8%] | 0.255                   |     | 93.3%         | [91.7% , 94.5%] | 0.265                   |     | 94.5%          | [92.5% , 96.1%] |
| wave 5                                  | 88.2%               | [84.9% , 90.9%] | 0.018                   | *   | 92.2%         | [90.6% , 93.6%] | 0.891                   |     | 92.1%          | [89.7% , 93.9%] |
| <b>Facemask</b>                         |                     |                 |                         |     |               |                 |                         |     |                |                 |
| wave 1                                  | 6.3%                | [4.6% , 8.7%]   | 0.017                   | *   | 9.5%          | [8.0% , 11.3%]  | 0.125                   |     | 7.5%           | [5.8% , 9.7%]   |
| wave 2                                  | 41.9%               | [37.7% , 46.1%] | 0.033                   | *   | 47.4%         | [44.6% , 50.2%] | 0.001                   | **  | 54.8%          | [51.2% , 58.3%] |
| wave 3                                  | 64.8%               | [60.6% , 68.8%] | 0.014                   | *   | 70.9%         | [68.3% , 73.3%] | 0.000                   | *** | 78.2%          | [75.1% , 81.0%] |
| wave 4                                  | 75.2%               | [71.2% , 78.8%] | 0.050                   | *   | 79.6%         | [77.3% , 81.7%] | 0.000                   | *** | 88.1%          | [85.5% , 90.3%] |
| wave 5                                  | 76.1%               | [72.0% , 79.7%] | 0.009                   | **  | 81.9%         | [79.7% , 84.0%] | 0.000                   | *** | 91.3%          | [89.0% , 93.2%] |
| <b>Avoid Restaurants</b>                |                     |                 |                         |     |               |                 |                         |     |                |                 |
| wave 1                                  | 28.7%               | [24.9% , 32.7%] | 0.003                   | **  | 35.7%         | [33.1% , 38.4%] | 0.054                   |     | 40.0%          | [36.6% , 43.5%] |
| wave 2                                  | 87.5%               | [84.2% , 90.2%] | 0.262                   |     | 85.5%         | [83.4% , 87.4%] | 0.000                   | *** | 90.8%          | [88.5% , 92.8%] |
| wave 3                                  | 80.2%               | [76.5% , 83.4%] | 0.183                   |     | 82.9%         | [80.7% , 84.9%] | 0.000                   | *** | 88.7%          | [86.1% , 90.9%] |
| wave 4                                  | 73.6%               | [69.6% , 77.2%] | 0.003                   | **  | 80.3%         | [78.0% , 82.4%] | 0.000                   | *** | 87.2%          | [84.5% , 89.5%] |
| wave 5                                  | 63.2%               | [58.9% , 67.3%] | 0.000                   | *** | 74.2%         | [71.7% , 76.5%] | 0.000                   | *** | 83.5%          | [80.4% , 86.1%] |
| <b>Cancel Social Activities</b>         |                     |                 |                         |     |               |                 |                         |     |                |                 |
| wave 1                                  | 30.2%               | [26.4% , 34.2%] | 0.120                   |     | 33.9%         | [31.3% , 36.6%] | 0.000                   | *** | 44.6%          | [41.2% , 48.1%] |
| wave 2                                  | 74.6%               | [70.6% , 78.2%] | 0.340                   |     | 76.8%         | [74.3% , 79.1%] | 0.104                   |     | 79.9%          | [76.8% , 82.6%] |
| wave 3                                  | 63.8%               | [59.6% , 67.8%] | 0.168                   |     | 67.2%         | [64.6% , 69.7%] | 0.956                   |     | 67.1%          | [63.7% , 70.3%] |
| wave 4                                  | 49.1%               | [44.8% , 53.4%] | 0.011                   | *   | 55.7%         | [52.9% , 58.4%] | 0.036                   | *   | 60.4%          | [56.9% , 63.8%] |
| wave 5                                  | 37.9%               | [33.8% , 42.1%] | 0.000                   | *** | 47.1%         | [44.3% , 49.9%] | 0.048                   | *   | 51.6%          | [48.1% , 55.2%] |
| <b>Risky Behaviors<sup>4</sup></b>      |                     |                 |                         |     |               |                 |                         |     |                |                 |
| <b>Have Visitors</b>                    |                     |                 |                         |     |               |                 |                         |     |                |                 |
| wave 1                                  | 27.0%               | [23.2% , 31.1%] | 0.168                   |     | 23.7%         | [21.4% , 26.2%] | 0.015                   | *   | 19.0%          | [16.3% , 22.1%] |
| wave 2                                  | 30.0%               | [26.2% , 34.1%] | 0.200                   |     | 27.0%         | [24.6% , 29.5%] | 0.003                   | **  | 21.2%          | [18.4% , 24.2%] |
| wave 3                                  | 42.0%               | [37.8% , 46.2%] | 0.001                   | **  | 33.5%         | [31.0% , 36.2%] | 0.000                   | *** | 26.2%          | [23.2% , 29.4%] |
| wave 4                                  | 47.4%               | [43.1% , 51.7%] | 0.006                   | **  | 40.2%         | [37.5% , 43.0%] | 0.004                   | **  | 33.8%          | [30.5% , 37.3%] |
| <b>Go to Other House</b>                |                     |                 |                         |     |               |                 |                         |     |                |                 |
| wave 1                                  | 22.8%               | [19.3% , 26.6%] | 0.959                   |     | 22.9%         | [20.6% , 25.3%] | 0.010                   | *   | 18.1%          | [15.5% , 21.1%] |
| wave 2                                  | 28.4%               | [24.7% , 32.4%] | 0.887                   |     | 28.1%         | [25.7% , 30.6%] | 0.000                   | *** | 18.7%          | [16.1% , 21.5%] |
| wave 3                                  | 35.8%               | [31.8% , 40.0%] | 0.332                   |     | 33.4%         | [30.8% , 36.0%] | 0.001                   | **  | 26.3%          | [23.3% , 29.5%] |
| wave 4                                  | 42.8%               | [38.6% , 47.1%] | 0.618                   |     | 41.5%         | [38.8% , 44.3%] | 0.001                   | **  | 34.0%          | [30.7% , 37.5%] |
| <b>Go to Public Places</b>              |                     |                 |                         |     |               |                 |                         |     |                |                 |
| wave 1                                  | 1.5%                | [0.7% , 3.2%]   | 0.617                   |     | 1.1%          | [0.7% , 1.9%]   | 0.903                   |     | 1.2%           | [0.6% , 2.6%]   |
| wave 2                                  | 0.5%                | [0.1% , 1.8%]   | 0.008                   | **  | 1.8%          | [1.2% , 2.7%]   | 0.157                   |     | 1.0%           | [0.5% , 2.1%]   |
| wave 3                                  | 2.4%                | [1.4% , 3.9%]   | 0.988                   |     | 2.4%          | [1.7% , 3.4%]   | 0.012                   | *   | 1.0%           | [0.5% , 2.0%]   |
| wave 4                                  | 8.7%                | [6.5% , 11.6%]  | 0.005                   | **  | 4.8%          | [3.8% , 6.1%]   | 0.042                   | *   | 3.0%           | [1.9% , 4.6%]   |
| <b>Gather with 10 +</b>                 |                     |                 |                         |     |               |                 |                         |     |                |                 |
| wave 1                                  | 1.8%                | [0.9% , 3.5%]   | 0.614                   |     | 2.2%          | [1.5% , 3.1%]   | 0.108                   |     | 1.2%           | [0.6% , 2.4%]   |
| wave 2                                  | 3.4%                | [2.1% , 5.5%]   | 0.310                   |     | 2.4%          | [1.7% , 3.5%]   | 0.004                   | **  | 0.9%           | [0.5% , 1.7%]   |
| wave 3                                  | 6.2%                | [4.3% , 8.7%]   | 0.142                   |     | 4.3%          | [3.3% , 5.7%]   | 0.006                   | **  | 2.0%           | [1.2% , 3.4%]   |
| wave 4                                  | 14.5%               | [11.5% , 18.2%] | 0.000                   | *** | 7.3%          | [6.0% , 8.8%]   | 0.005                   | **  | 4.4%           | [3.1% , 6.2%]   |
| <b>Non-household Contact</b>            |                     |                 |                         |     |               |                 |                         |     |                |                 |
| wave 1                                  | 37.6%               | [33.4% , 41.9%] | 0.163                   |     | 41.2%         | [38.5% , 44.0%] | 0.110                   |     | 37.6%          | [34.1% , 41.1%] |
| wave 2                                  | 43.8%               | [39.6% , 48.0%] | 0.883                   |     | 43.4%         | [40.7% , 46.1%] | 0.086                   |     | 39.5%          | [36.1% , 43.0%] |
| wave 3                                  | 50.1%               | [45.8% , 54.3%] | 0.208                   |     | 46.8%         | [44.0% , 49.5%] | 0.251                   |     | 44.2%          | [40.7% , 47.7%] |
| wave 4                                  | 59.7%               | [55.4% , 63.8%] | 0.031                   | *   | 54.1%         | [51.3% , 56.9%] | 0.642                   |     | 53.1%          | [49.5% , 56.6%] |

\*p<.05; \*\*p<.01; \*\*\*p<.001 (two-sided t test)

<sup>1</sup> The difference between those who trust Fox News more and those who trust CNN and Fox News equally.

<sup>2</sup> The difference between those who trust CNN more and those who trust CNN and Fox News equally.

<sup>3</sup> Preventive behaviors include: “worn a facemask”, “washed your hands with soap or used hand sanitizer several times per day”, “canceled or postponed personal or social activities”, “avoided eating at restaurants”, and “avoided public spaces, gatherings, or crowds”.

<sup>4</sup> Risky behaviors include: “Gone out to a bar, club, or other places where people gather”, “gone to a friend, neighbor, or relative’s residence (that is not your own)”, “had visitors such as friends, neighbors or relatives at your residence”, “attended a gathering with more than 10 people, such as a reunion, wedding, funeral, birthday party, concert, or religious service”, “had close contact (within 6 feet) with people who do not live with you”.

Supplemental Table 2. Predicting Preventive & Risky Behaviors Scores (with Confidence Intervals Reported)

|                                                                    | Preventive Behaviors |                       |             |                       | Risky Behaviors |                       |             |                       |
|--------------------------------------------------------------------|----------------------|-----------------------|-------------|-----------------------|-----------------|-----------------------|-------------|-----------------------|
|                                                                    | Model 1              |                       | Model 2     |                       | Model 1         |                       | Model 2     |                       |
|                                                                    | n = 4,863            |                       | n = 4,863   |                       | n = 4,841       |                       | n = 4,841   |                       |
|                                                                    | $\beta$              | 95% CI                | $\beta$     | 95% CI                | $\beta$         | 95% CI                | $\beta$     | 95% CI                |
| <b>Media Preference</b> - Reference: Trust CNN More                |                      |                       |             |                       |                 |                       |             |                       |
| Trust CNN and Fox News Equally                                     | -<br>0.126*          | [-0.225 , -<br>0.028] | -0.052      | [-0.149 ,<br>0.046]   | 0.109*          | [0.012 ,<br>0.205]    | 0.094       | [-0.003 ,<br>0.191]   |
| Trust Fox News More                                                | -<br>0.163*          | [-0.279 , -<br>0.047] | -0.105      | [-0.22 ,<br>0.010]    | 0.129*          | [0.012 ,<br>0.245]    | 0.121*      | [0.003 ,<br>0.238]    |
| <b>Survey Wave</b> - Reference: Wave 2: 4/1 - 4/29                 |                      |                       |             |                       |                 |                       |             |                       |
| Wave 1: 3/10 - 3/31                                                | -<br>1.685*          | [-1.795 , -<br>1.575] | -<br>1.686* | [-1.796 , -<br>1.577] |                 |                       |             |                       |
| Wave 3: 4/15 - 5/12                                                | 0.076                | [-0.004 ,<br>0.156]   | 0.076       | [-0.005 ,<br>0.156]   | 0.044           | [-0.029 ,<br>0.117]   | 0.043       | [-0.030 ,<br>0.116]   |
| Wave 4: 4/29 - 5/26                                                | 0.076                | [-0.004 ,<br>0.157]   | 0.077       | [-0.004 ,<br>0.157]   | 0.226*          | [0.149 ,<br>0.303]    | 0.226*      | [0.149 ,<br>0.303]    |
| Wave 5: 5/13 - 6/9                                                 | -0.081               | [-0.173 ,<br>0.011]   | -0.080      | [-0.172 ,<br>0.011]   | 0.511*          | [0.426 ,<br>0.595]    | 0.510*      | [0.426 ,<br>0.595]    |
| <b>Media Preference <math>\times</math> Wave</b>                   |                      |                       |             |                       |                 |                       |             |                       |
| Trust Fox News and CNN Equally                                     |                      |                       |             |                       |                 |                       |             |                       |
| $\times$ Wave 1                                                    | -0.089               | [-0.230 ,<br>0.051]   | -0.089      | [-0.229 ,<br>0.051]   |                 |                       |             |                       |
| $\times$ Wave 3                                                    | 0.015                | [-0.085 ,<br>0.115]   | 0.013       | [-0.087 ,<br>0.113]   | 0.074           | [-0.018 ,<br>0.167]   | 0.075       | [-0.017 ,<br>0.167]   |
| $\times$ Wave 4                                                    | -<br>0.112*          | [-0.215 , -<br>0.010] | -<br>0.111* | [-0.214 , -<br>0.009] | 0.066           | [-0.034 ,<br>0.067]   | 0.067       | [-0.033 ,<br>0.167]   |
| $\times$ Wave 5                                                    | -<br>0.132*          | [-0.248 , -<br>0.016] | -<br>0.134* | [-0.249 , -<br>0.019] | 0.056           | [-0.052 ,<br>0.164]   | 0.057       | [-0.052 ,<br>0.165]   |
| Trust Fox News More                                                |                      |                       |             |                       |                 |                       |             |                       |
| $\times$ Wave 1                                                    | -<br>0.194*          | [-0.359 , -<br>0.028] | -<br>0.193* | [-0.358 , -<br>0.028] |                 |                       |             |                       |
| $\times$ Wave 3                                                    | -0.102               | [-0.227 ,<br>0.0230]  | -0.102      | [-0.226 ,<br>0.022]   | 0.115*          | [0.006 ,<br>0.224]    | 0.116*      | [0.007 ,<br>0.225]    |
| $\times$ Wave 4                                                    | -<br>0.301*          | [-0.433 , -<br>0.168] | -<br>0.302* | [-0.434 , -<br>0.170] | 0.231*          | [0.106 ,<br>0.356]    | 0.233*      | [0.108 ,<br>0.357]    |
| $\times$ Wave 5                                                    | -<br>0.505*          | [-0.655 , -<br>0.354] | -<br>0.506* | [-0.656 , -<br>0.355] | 0.312*          | [0.171 ,<br>0.453]    | 0.314*      | [0.173 ,<br>0.455]    |
| <b>Age Groups</b> - Reference: Aged 18-44                          |                      |                       |             |                       |                 |                       |             |                       |
| Aged 45-64                                                         | 0.251*               | [0.170 ,<br>0.332]    | 0.227*      | [0.151 ,<br>0.304]    | -<br>0.155*     | [-0.238 , -<br>0.071] | -<br>0.156* | [-0.239 , -<br>0.073] |
| Aged 65 and above                                                  | 0.365*               | [0.266 ,<br>0.464]    | 0.328*      | [0.233 ,<br>0.423]    | -<br>0.207*     | [-0.308 , -<br>0.106] | -<br>0.209* | [-0.310 , -<br>0.109] |
|                                                                    | -<br>0.173*          | [-0.241 , -<br>0.104] | -<br>0.154* | [-0.221 , -<br>0.088] | 0.099*          | [0.027 ,<br>0.171]    | 0.088*      | [0.016 ,<br>0.161]    |
| <b>Male Racial / Ethnic Groups</b> - Reference: Non-Hispanic White |                      |                       |             |                       |                 |                       |             |                       |
| Non-Hispanic Black                                                 | 0.286*               | [0.160 ,<br>0.412]    | 0.218*      | [0.097 ,<br>0.338]    | -0.068          | [-0.195 ,<br>0.058]   | -0.082      | [-0.208 ,<br>0.044]   |
| Hispanic                                                           | 0.423*               | [0.312 ,<br>0.533]    | 0.377*      | [0.272 ,<br>0.482]    | -0.033          | [-0.159 ,<br>0.092]   | -0.023      | [-0.147 ,<br>0.101]   |
| Non-Hispanic Asian                                                 | 0.428*               | [0.275 ,<br>0.580]    | 0.363*      | [0.205 ,<br>0.520]    | 0.306*          | [-0.450 , -<br>0.161] | 0.316*      | [-0.464 , -<br>0.168] |
| Non-Hispanic Others                                                | 0.026                | [-0.161 ,<br>0.213]   | -0.007      | [-0.200 ,<br>0.186]   | 0.161           | [-0.042 ,<br>0.364]   | 0.156       | [-0.055 ,<br>0.367]   |
| <b>Education Level</b> - Reference: High School and Less           |                      |                       |             |                       |                 |                       |             |                       |
| Some College                                                       | 0.094*               | [0.006 ,<br>0.181]    | 0.068       | [-0.015 ,<br>0.152]   | 0.002           | [-0.088 ,<br>0.091]   | 0.021       | [-0.069 ,<br>0.111]   |
| College and Higher                                                 | 0.192*               | [0.099 ,<br>0.284]    | 0.144*      | [0.054 ,<br>0.235]    | -<br>0.098*     | [-0.197 ,<br>0.000]   | -0.068      | [-0.167 ,<br>0.032]   |
| <b>Household Income</b> - Reference: Less than \$30,000            |                      |                       |             |                       |                 |                       |             |                       |

|                                                                    |              |                     |              |                     |              |                     |                   |                     |
|--------------------------------------------------------------------|--------------|---------------------|--------------|---------------------|--------------|---------------------|-------------------|---------------------|
| \$30,000 to \$59,999                                               | 0.065        | [-0.040 ,<br>0.169] | 0.062        | [-0.037 ,<br>0.161] | 0.040        | [-0.062 ,<br>0.142] | 0.044             | [-0.058 ,<br>0.146] |
| \$60,000 to \$99,999                                               | 0.031        | [-0.075 ,<br>0.137] | 0.017        | [-0.085 ,<br>0.119] | 0.087        | [-0.020 ,<br>0.195] | 0.098             | [-0.009 ,<br>0.205] |
| \$100,000 or more                                                  | 0.106        | [-0.010 ,<br>0.222] | 0.094        | [-0.017 ,<br>0.205] | 0.064        | [-0.051 ,<br>0.179] | 0.073             | [-0.041 ,<br>0.188] |
| <b>Working Status</b> - Reference: Have a Job & Can Work from Home |              |                     |              |                     |              |                     |                   |                     |
| Have a Job & Cannot Work from Home                                 | 0.139*<br>*  | [-0.235 ,<br>0.043] | 0.131*<br>*  | [-0.225 ,<br>0.037] | 0.141*<br>*  | [0.036 ,<br>0.246]  | 0.139*<br>*       | [0.034 ,<br>0.244]  |
| Have No Job                                                        | -0.024       | [-0.118 ,<br>0.071] | -0.017       | [-0.111 ,<br>0.076] | -<br>0.126*  | [-0.229 ,<br>0.023] | -<br>0.121*       | [-0.225 ,<br>0.017] |
| <b>Self-Reported Access to Professional Information Sources</b>    |              |                     | 0.110*<br>** | [0.087 ,<br>0.132]  |              |                     | -<br>0.060*<br>** | [-0.085 ,<br>0.034] |
| <b>Diversity of Information Sources</b>                            |              |                     | 0.033*<br>** | [0.023 ,<br>0.043]  |              |                     | 0.013*<br>**      | [0.003 ,<br>0.024]  |
| <b>Constant</b>                                                    | 3.796*<br>** | [3.629 ,<br>3.963]  | 3.319*<br>** | [3.131 ,<br>3.507]  | 0.878*<br>** | [0.717 ,<br>1.038]  | 0.951*<br>**      | [0.771 ,<br>1.130]  |
| <b>R-Square</b>                                                    | 0.289        |                     | 0.317        |                     | 0.076        |                     | 0.082             |                     |

\*  $p < 0.05$  \*\*  $p < 0.01$  \*\*\*  $p < 0.001$  (two-sided  $t$  test)
